# Supplementary material for: Semi-synthesis and anti-lung cancer activity evaluation of aryl dihydrothiazol acyl podophyllotoxin ester derivatives
Source: Royal Society of Chemistry journal article supplement (doi:10.1039/c5ra01871d), 2015-01-01
Supplement: c5ra01871d1.pdf [file c5ra01871d1.pdf]

## Semi-synthesis and anti-lung cancer activity evaluation of aryl dihydrothiazol acyl podophyllotoxin ester derivatives

Hong-Yan Lin<sup>a,b</sup>, Li-Fei Bai<sup>c</sup>, Fang Wang<sup>a,b</sup>, Xun Wu<sup>a,b</sup>, Lu-Jing Han<sup>a,b</sup>, Shahla Karim Baloch<sup>a,b</sup>, Yong-Hua Yang<sup>a,b,\*</sup> and Xiao-Ming Wang<sup>a,b,\*</sup>

### Supporting Information

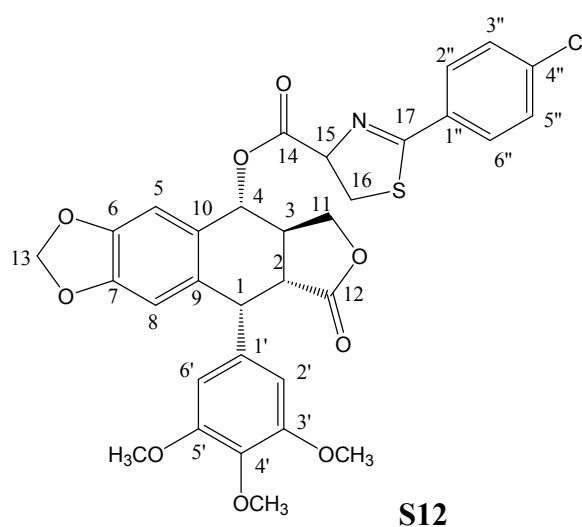

$^{13}\text{C}$  NMR( $\text{CDCl}_3$ , 300 MHz):  $\delta$  173.34 (13-C), 171.16 (14-C), 170.29 (17-C), 152.56 (3', 5'-C), 148.23 (7-C), 147.6 (6-C), 138.05 (4'-C), 137.07 (4''-C), 134.52 (1'-C), 132.45 (1''-C), 130.78 (9-C), 129.74 (2'', 6''-C), 128.79 (3'', 5''-C), 127.56 (10-C), 109.71 (8-C), 107.96 (2', 6'-C), 106.79 (5-C), 101.58 (13-C), 78.24 (15-C), 75.02 (4-C), 71.13 (11-C), 60.66 (4'-OCH<sub>3</sub>), 56.01 (3', 5'- OCH<sub>3</sub>), 45.43 (1-C), 43.63 (2-C), 38.43 (3-C), 33.84 (16-C).

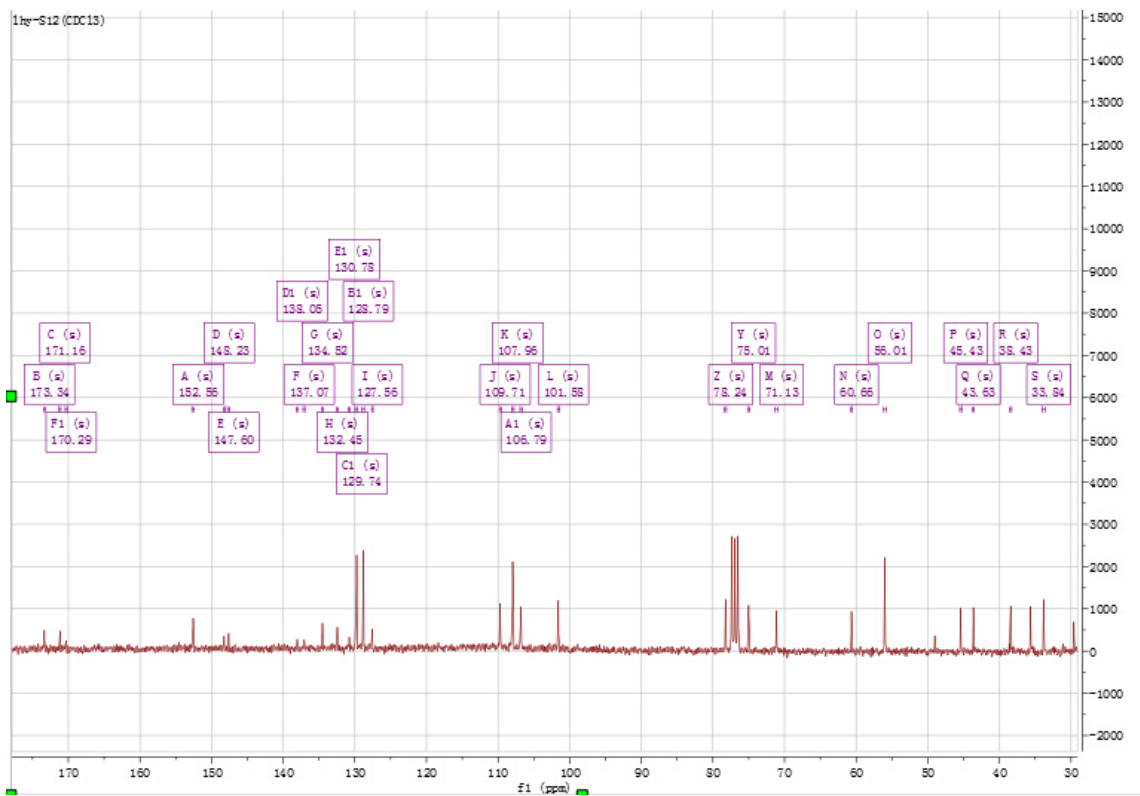

S12 <sup>13</sup>C NMR

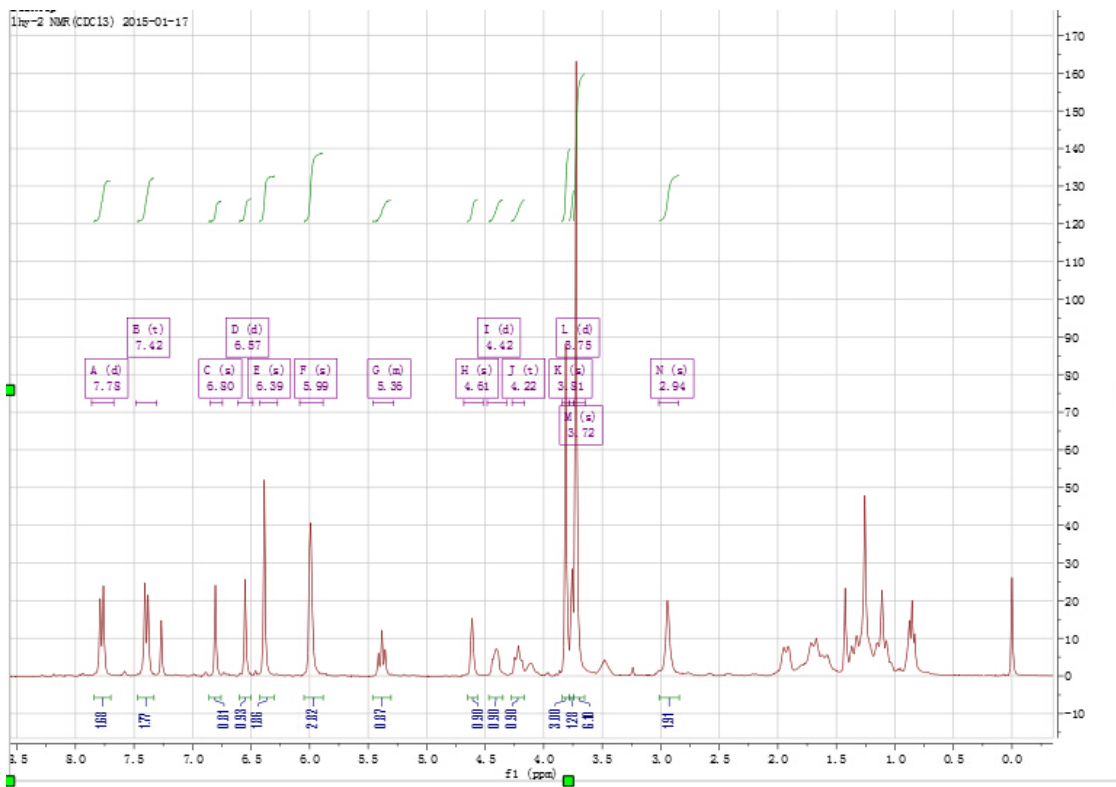

S12 <sup>1</sup>H NMR

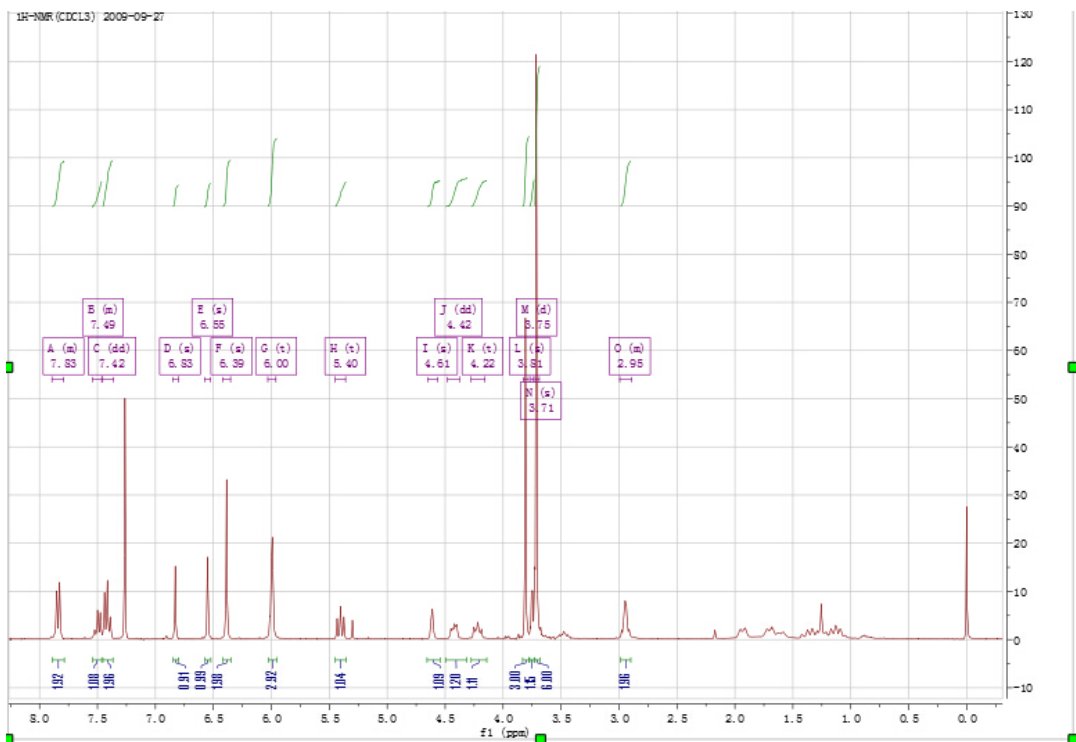

S1 <sup>1</sup>H NMR

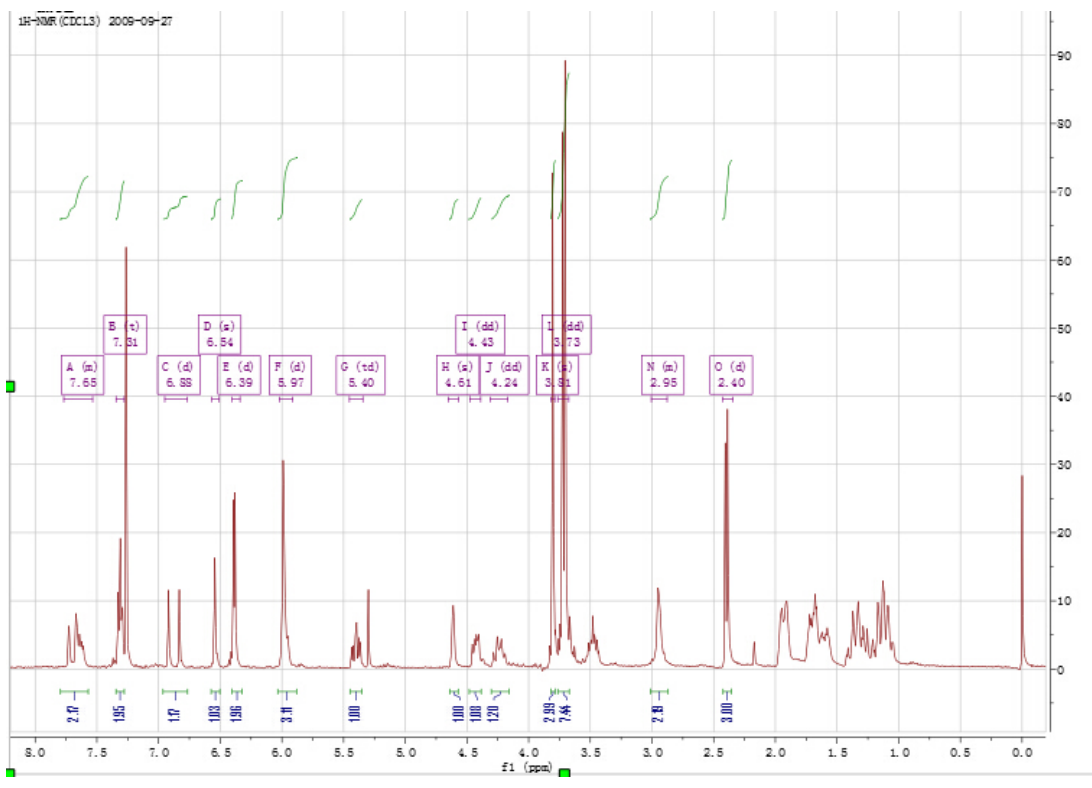

S2 <sup>1</sup>H NMR

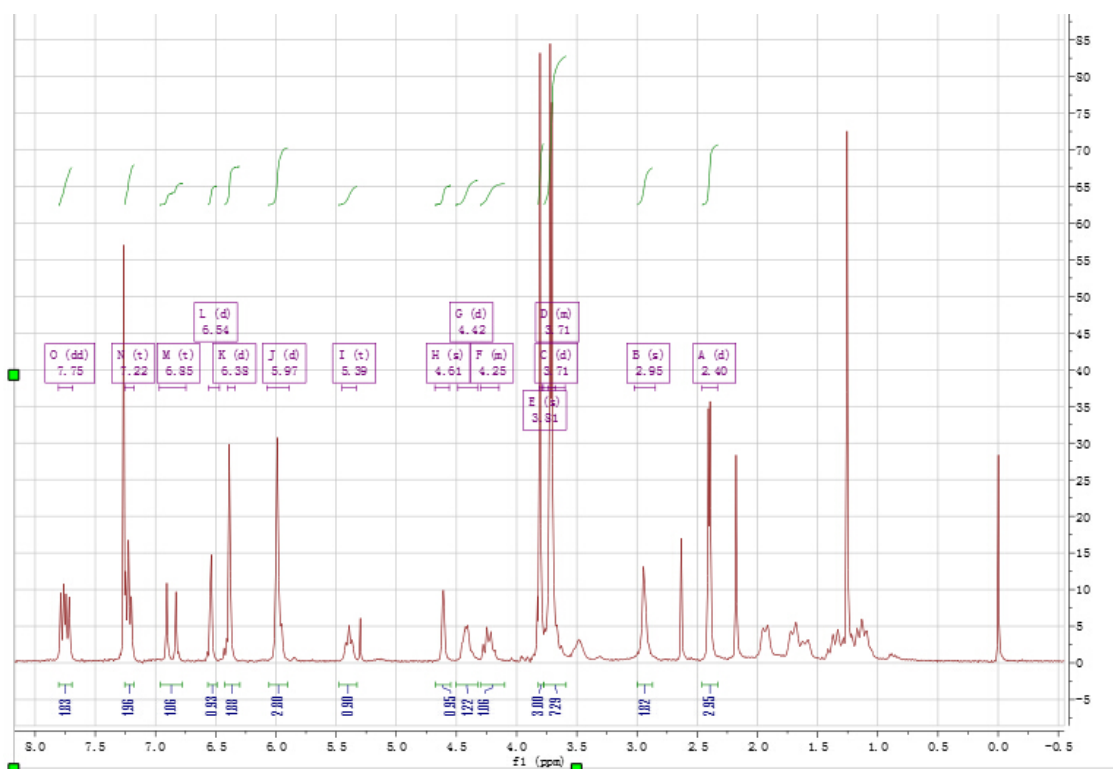

S3 <sup>1</sup>H NMR

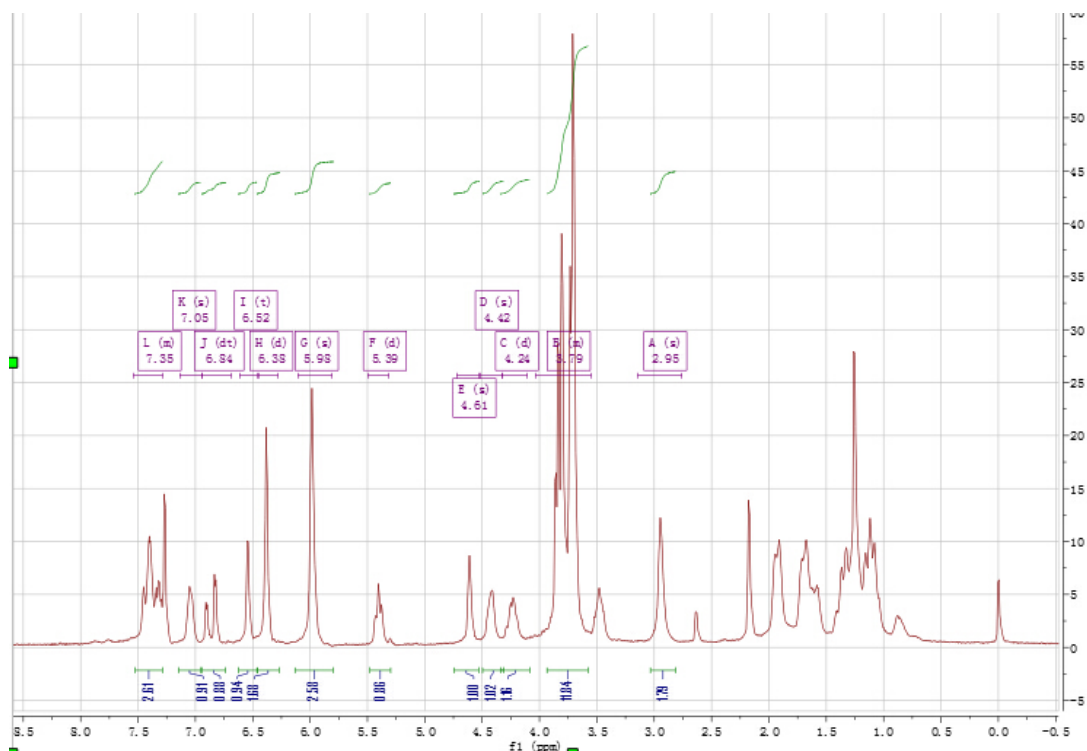

S4 <sup>1</sup>H NMR

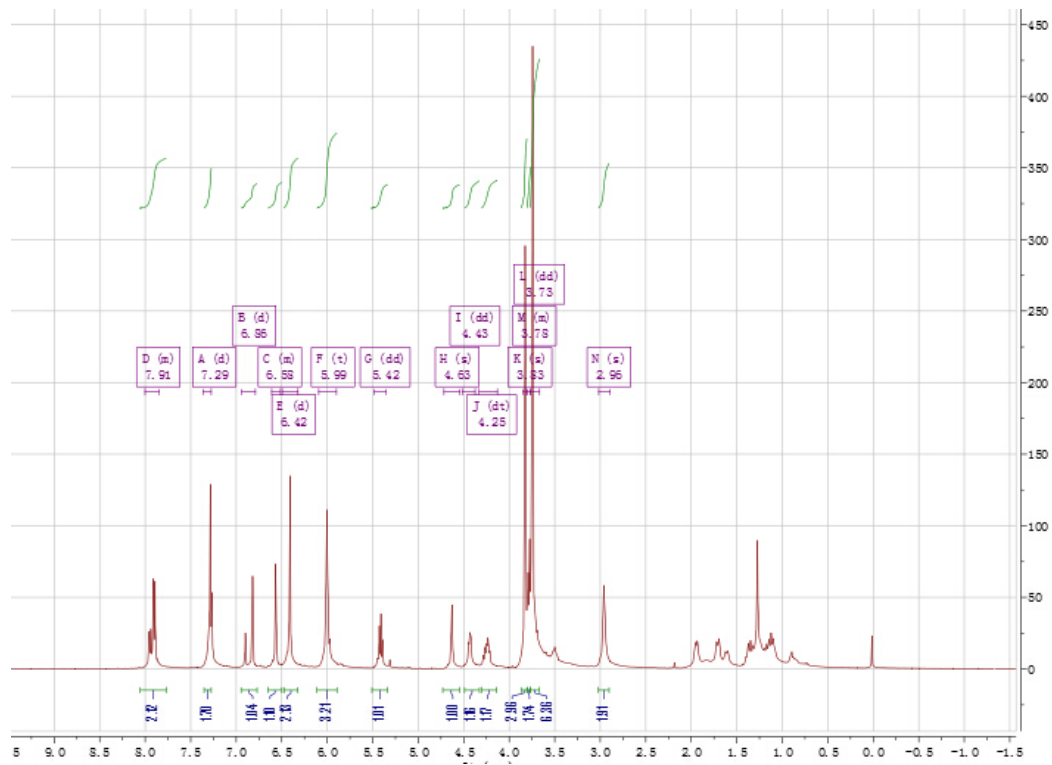

S5 <sup>1</sup>H NMR

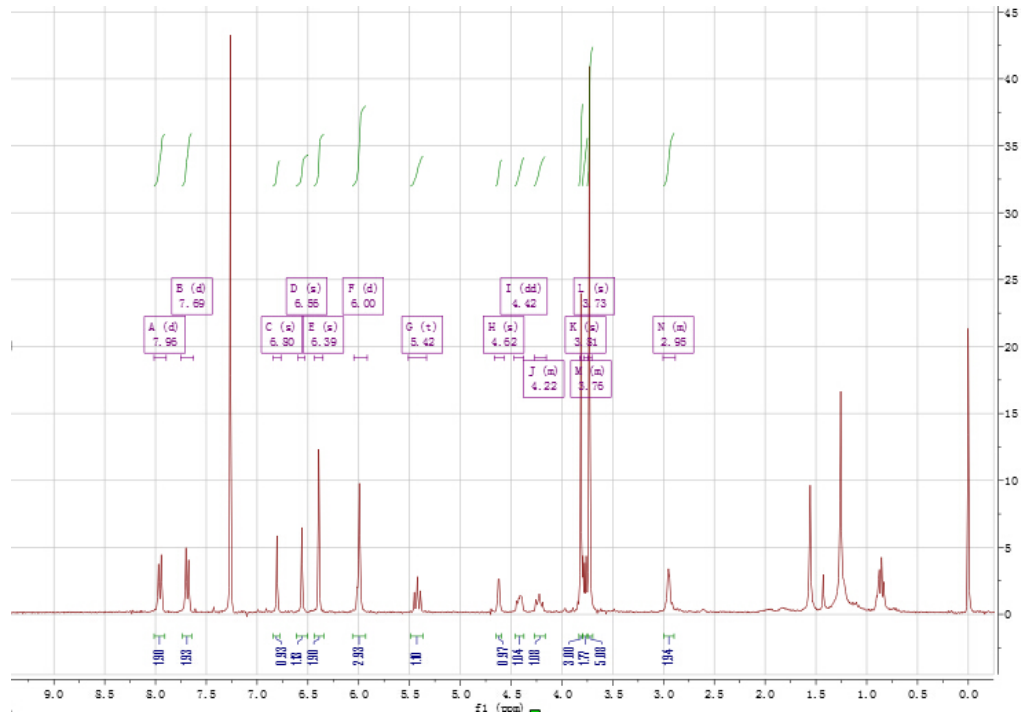

S6 <sup>1</sup>H NMR

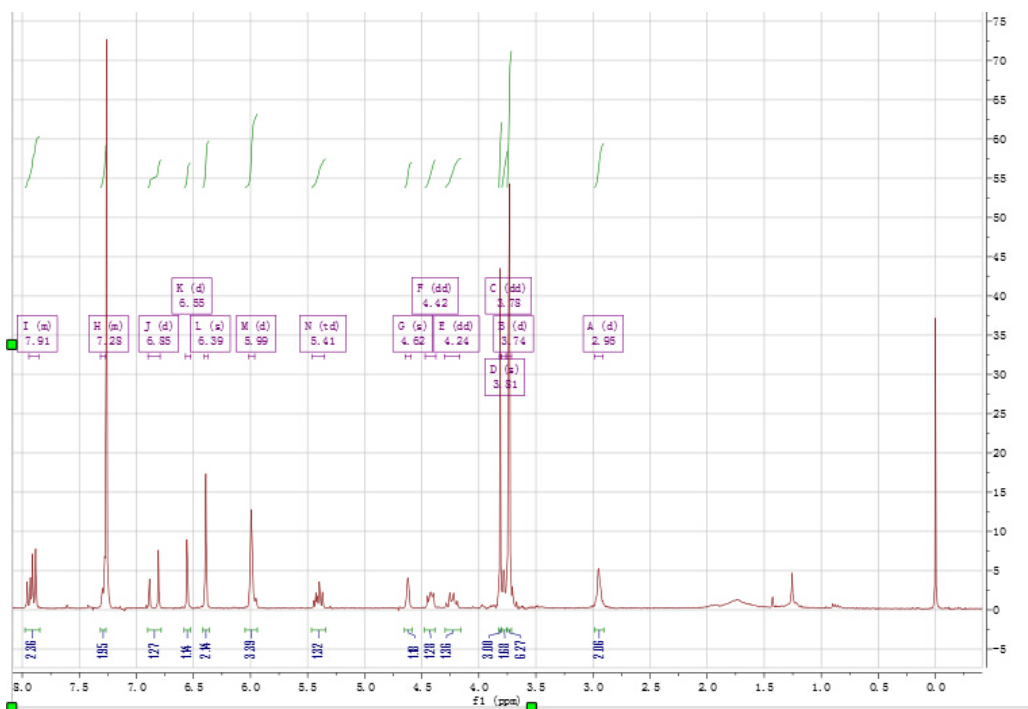

S7 <sup>1</sup>H NMR

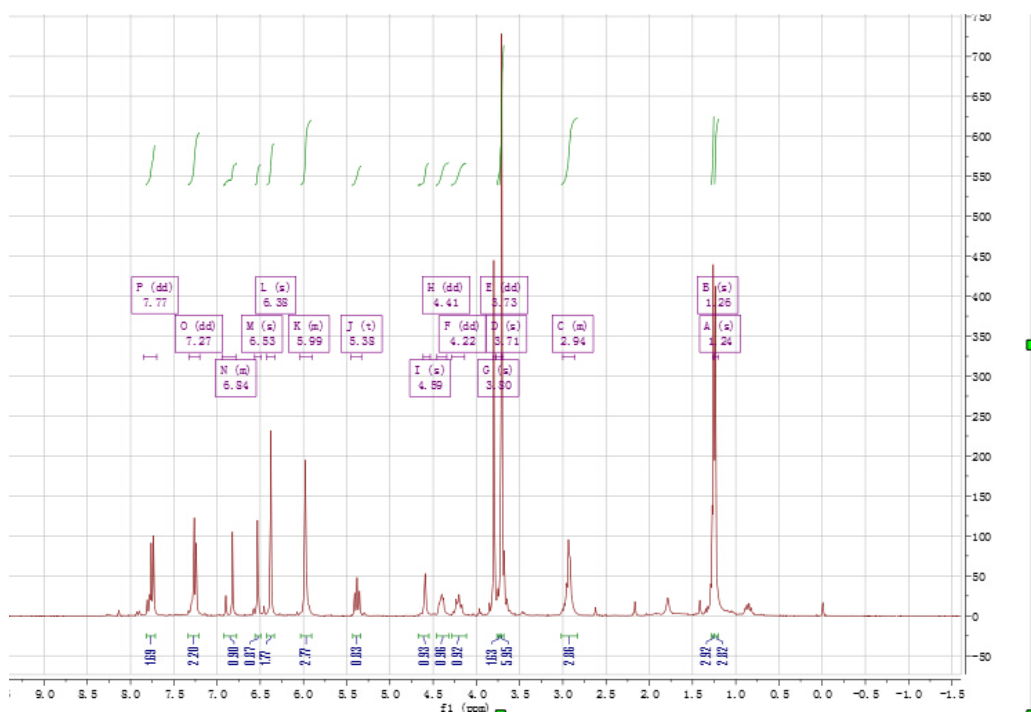

S8 <sup>1</sup>H NMR

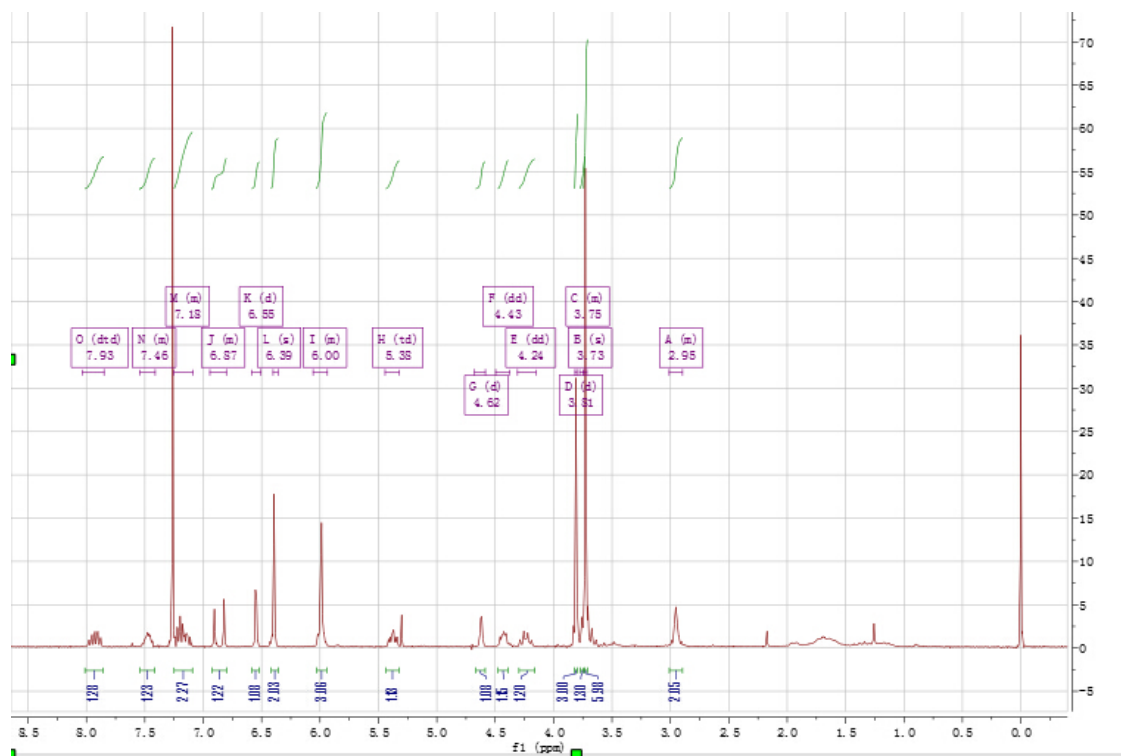

S9 <sup>1</sup>H NMR

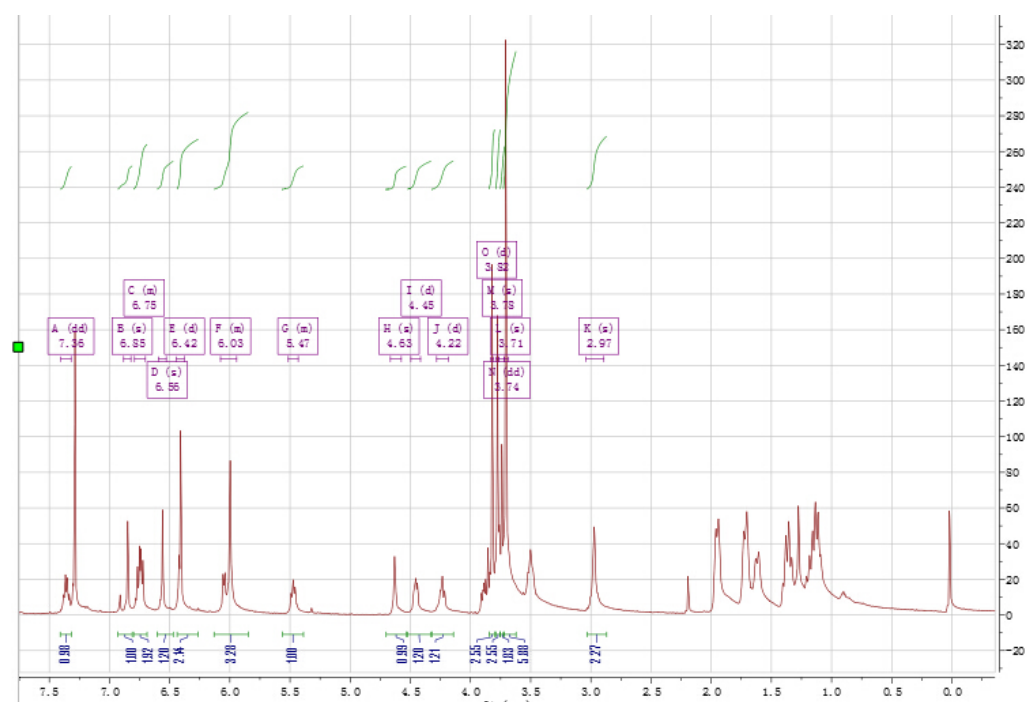

S10 <sup>1</sup>H NMR

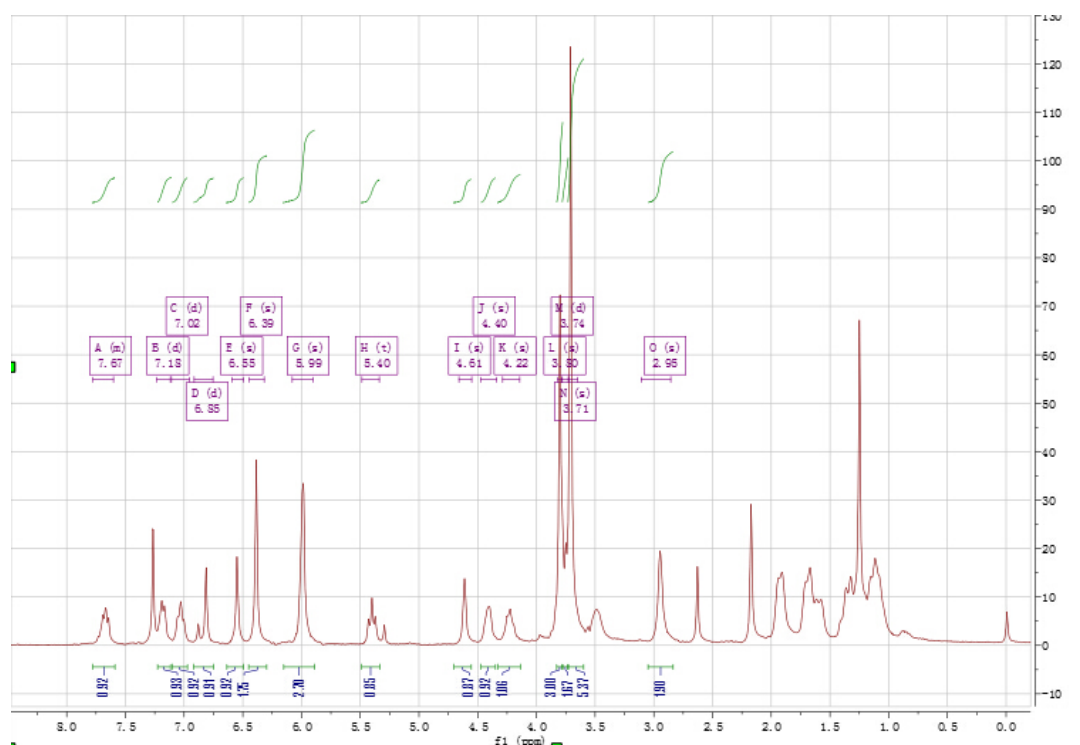

S11 <sup>1</sup>H NMR

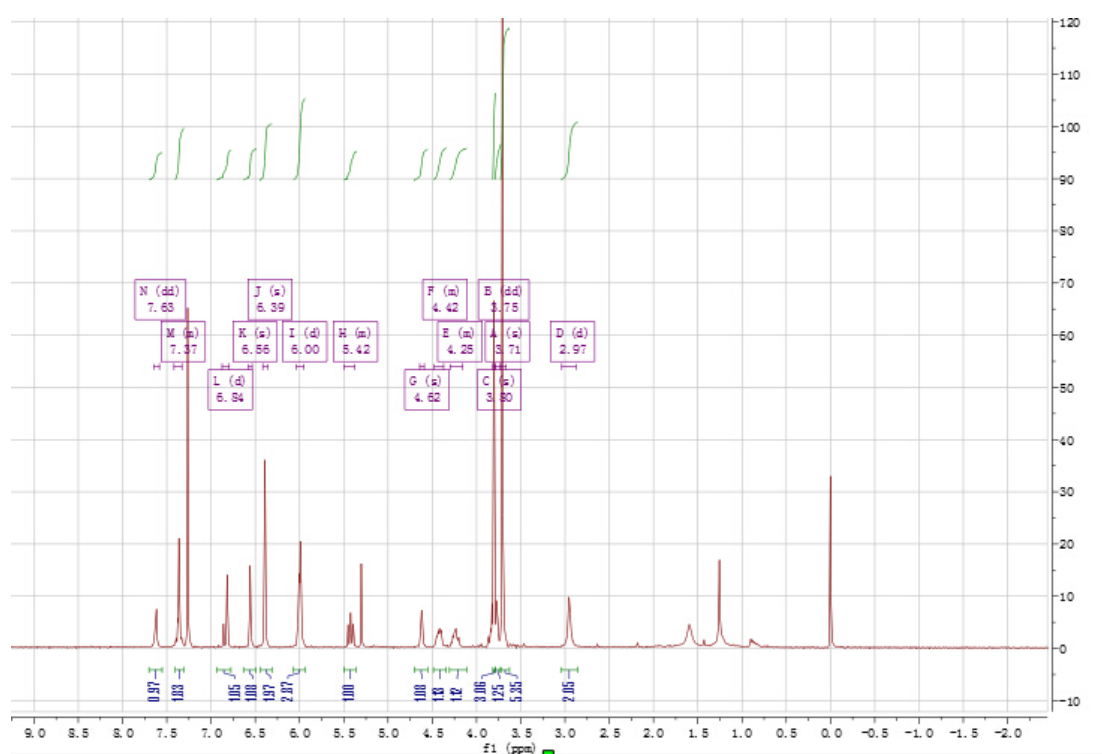

S13 <sup>1</sup>H NMR



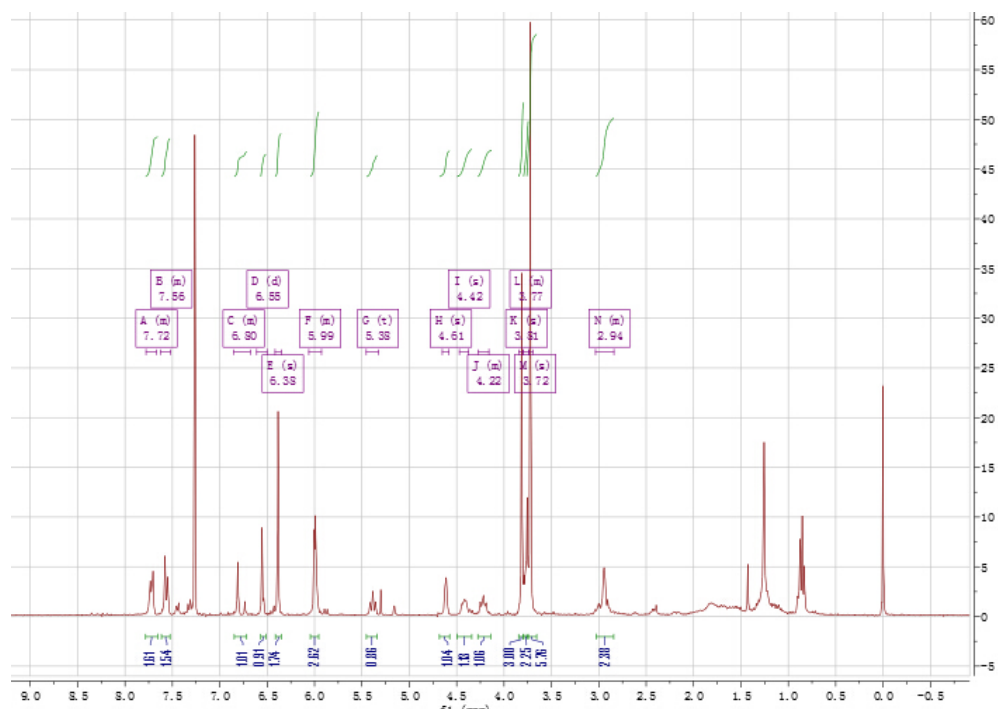

S14  $^1\text{H}$  NMR

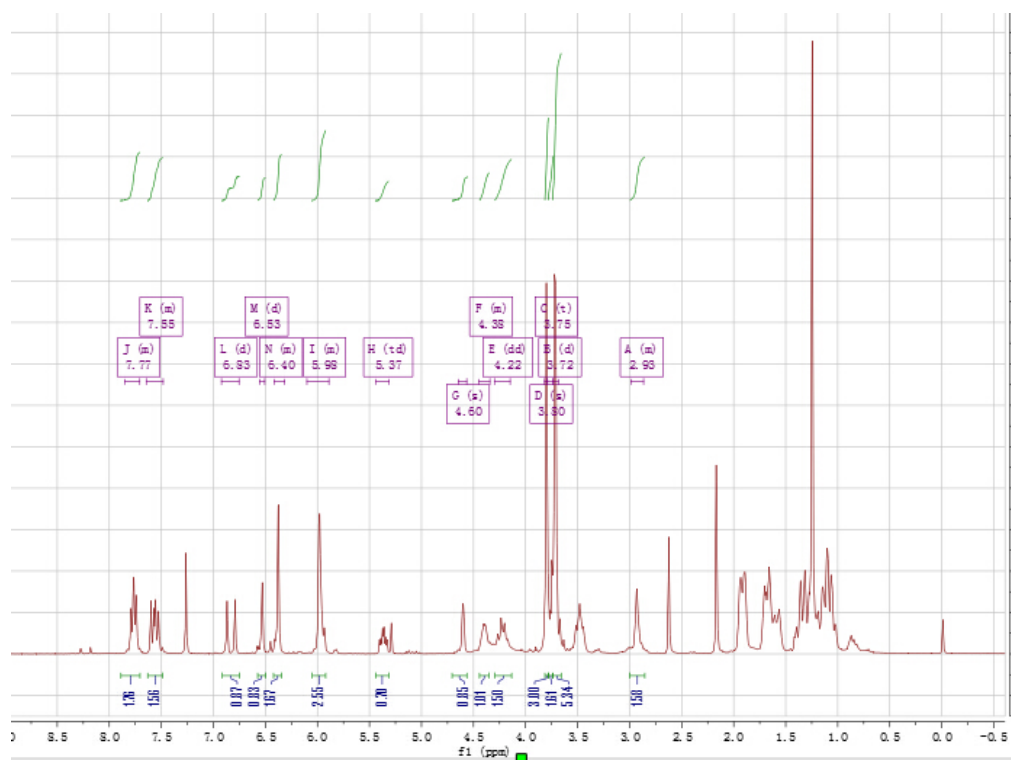

S15  $^1\text{H}$  NMR

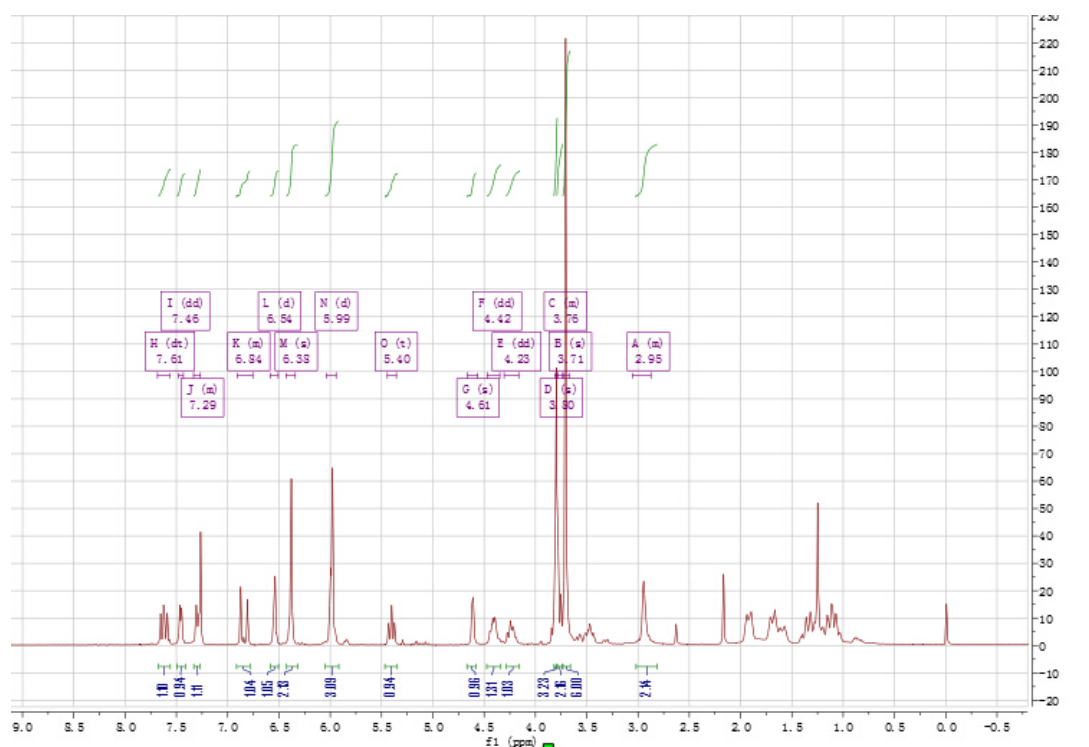

S16 <sup>1</sup>H NMR

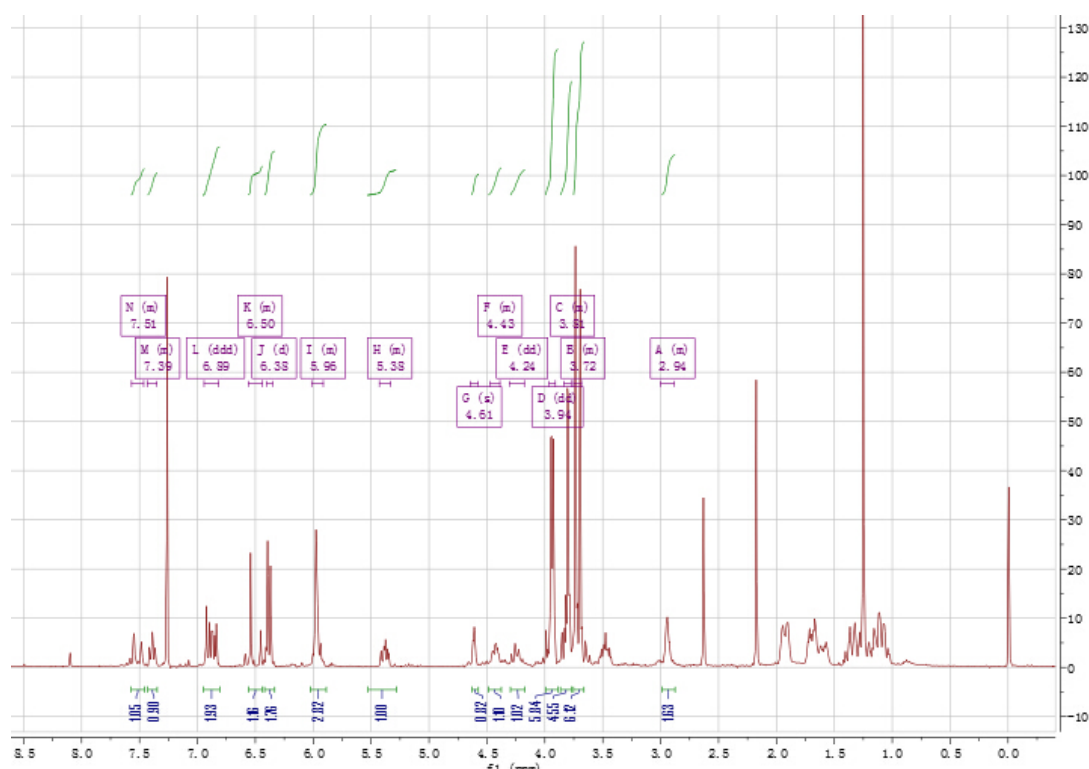

S17 <sup>1</sup>H NMR
